# Supplementary material
Source: PubMed Central journal article supplement (PMC9382997)
Supplement: 42761_2020_21_MOESM2_ESM.pdf [file 42761_2020_21_MOESM2_ESM.pdf]

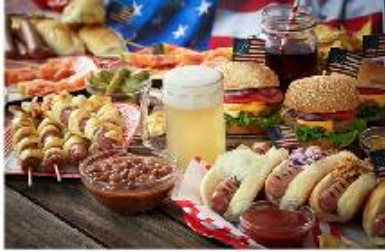

What type of food(s) was in the picture?

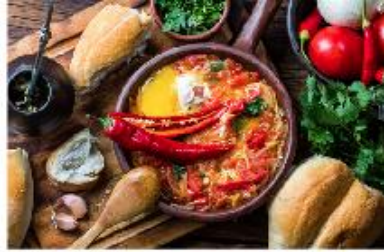

¿Qué tipo(s) de comida había en la imagen?

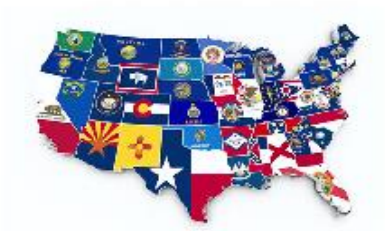

What flags did you recognize?

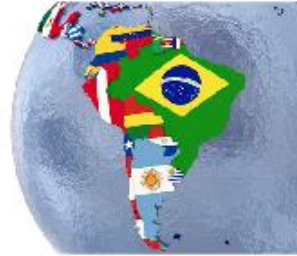

¿Cuáles banderas reconociste?

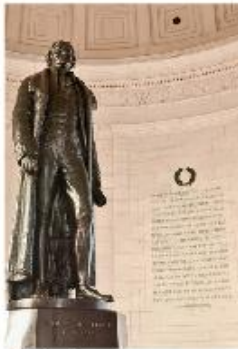

What did the writing in the image say?

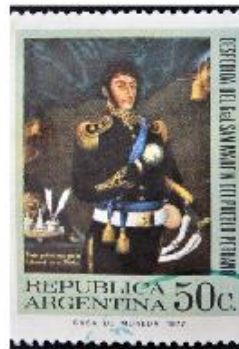

¿Qué decía el texto en la imagen?

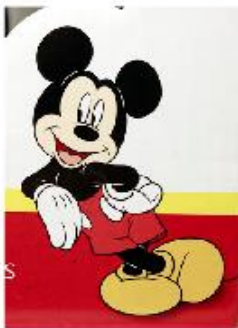

What country is this cartoon character from?

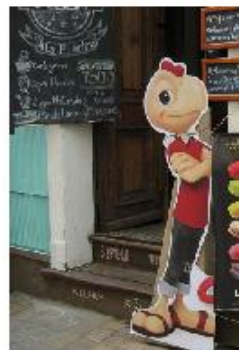

¿De qué país es esta caricatura?

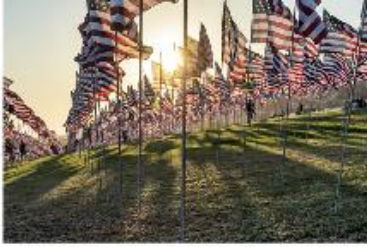

What holiday did the last image remind you of?

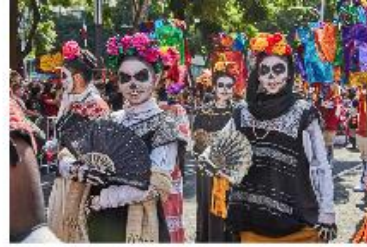

¿A qué día festivo te recordó la imagen anterior?

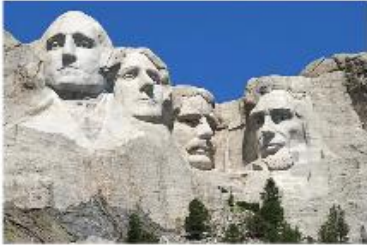

Name the landmark you just saw

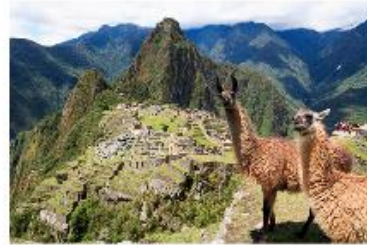

Nombra el sitio que acabas de ver

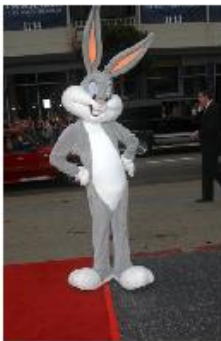

What show was that character from?

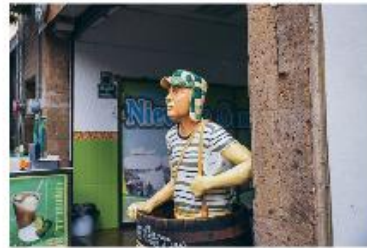

¿En qué programa sale este personaje?

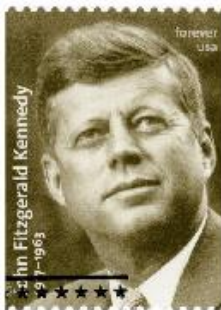

Who was the historical figure you just saw?

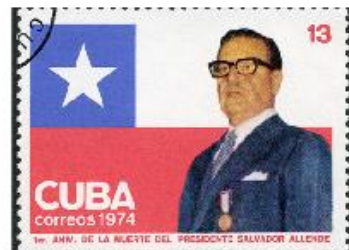

¿Quién fue la figura histórica que acabas de ver?
