# Supplementary material
Source: PubMed Central journal article supplement (PMC9382997)
Supplement: 42761_2020_21_MOESM3_ESM.pdf [file 42761_2020_21_MOESM3_ESM.pdf]

**Table S1:** Fixed Effects Variables Relationships to Pain Outcomes in Initial Models

| <i>Outcome</i><br><b>Predictors</b>              | <b>B</b> | <b>SE</b> | <b>t-value</b> | <b>p-value</b> | <b>Cohen's d</b> |
|--------------------------------------------------|----------|-----------|----------------|----------------|------------------|
| <i>Pain Unpleasantness</i>                       |          |           |                |                |                  |
| Session*                                         | -0.16    | 0.064     | -2.557         | .011           | -0.103           |
| Segment <sup>a</sup>                             | 0.03     | 0.091     | 0.379          | .705           | 0.015            |
| Temperature*                                     | 3.13     | 0.065     | 48.315         | <.001          | 1.943            |
| Removal*                                         | 1.21     | 0.199     | 6.078          | <.001          | 0.242            |
| Trial                                            | 0.008    | 0.014     | 0.610          | .542           | 0.025            |
| Age (in years)*                                  | -0.05    | 0.022     | -2.314         | .023           | -0.442           |
| Gender <sup>b</sup>                              | -0.45    | 0.652     | -0.695         | .559           | -0.988           |
| Language <sup>c</sup>                            | 0.02     | 0.091     | 0.249          | .804           | 0.010            |
| Cultural Dominance                               | -0.31    | 0.258     | -1.187         | .236           | -0.066           |
| Language x Segment                               | -0.02    | 0.129     | -0.146         | .884           | -0.006           |
| Language x Cultural Dominance                    | 0.06     | 0.189     | 0.303          | .762           | 0.012            |
| Language x Segment x Cultural Dominance          | -0.20    | 0.184     | -1.083         | .279           | -0.044           |
| <i>Pain Intensity</i>                            |          |           |                |                |                  |
| Session*                                         | -0.27    | 0.062     | -4.269         | <.001          | -0.171           |
| Segment <sup>a</sup>                             | -0.02    | 0.088     | -0.184         | .854           | -0.007           |
| Temperature*                                     | 3.10     | 0.063     | 49.102         | <.001          | 1.975            |
| Removal*                                         | 0.88     | 0.194     | 4.511          | <.001          | 0.180            |
| Trial                                            | 0.004    | 0.013     | 0.327          | .744           | 0.013            |
| Age (in years)*                                  | -0.05    | 0.022     | -2.488         | .014           | -0.473           |
| Gender <sup>b</sup>                              | -0.39    | 0.498     | -0.792         | .513           | -1.136           |
| Language <sup>c</sup>                            | 0.02     | 0.089     | 0.180          | .857           | 0.007            |
| Cultural Dominance                               | 0.05     | 0.252     | 0.195          | .845           | 0.011            |
| Language x Segment                               | 0.10     | 0.125     | 0.769          | .442           | 0.031            |
| Language x Cultural Dominance*                   | -0.47    | 0.184     | -2.535         | .011           | -0.102           |
| Language x Segment x Cultural Dominance          | 0.09     | 0.179     | 0.512          | .609           | 0.021            |
| <i>Pain Evoked Physiological Arousal (mSCRa)</i> |          |           |                |                |                  |
| Session*                                         | -0.16    | 0.030     | -5.236         | <.001          | -0.216           |
| Segment* <sup>a</sup>                            | -0.28    | 0.042     | -6.651         | <.001          | -0.275           |
| Temperature*                                     | 0.88     | 0.030     | 29.555         | <.001          | 1.222            |
| Removal*                                         | -0.24    | 0.089     | -2.726         | .006           | -0.112           |
| Trial*                                           | -0.08    | 0.006     | -12.989        | <.001          | -0.538           |
| Age (in years)*                                  | -0.05    | 0.010     | -4.442         | <.001          | -0.839           |
| Gender <sup>b</sup>                              | 0.19     | 0.199     | 0.971          | .335           | 0.225            |
| Language <sup>c</sup>                            | 0.06     | 0.042     | 1.315          | .189           | 0.054            |
| Cultural Dominance                               | -0.06    | 0.117     | -0.537         | .591           | -0.030           |
| Language x Segment                               | -0.05    | 0.059     | -0.913         | .361           | -0.038           |

|                                         |       |       |        |       |        |
|-----------------------------------------|-------|-------|--------|-------|--------|
| Language x Cultural Dominance*          | -0.20 | 0.085 | -2.337 | .020  | -0.097 |
| Language x Segment x Cultural Dominance | 0.08  | 0.084 | 0.924  | 0.356 | 0.038  |

\*Variables with significant ( $p < .05$ ) slopes. <sup>a</sup>Segment denotes comparison between pre-priming and post-priming trials, with negative values corresponding to higher pain outcomes pre-priming. <sup>b</sup>Negative values for gender denote higher pain outcomes in women. <sup>c</sup>Language coded as 0 for English, 1 for Spanish with negative values denoting higher pain outcomes in English. B-slope, SE-Standard Error, mSCRA- mean skin conductance response amplitude
