# Supplementary material
Source: PubMed Central journal article supplement (PMC9382997)

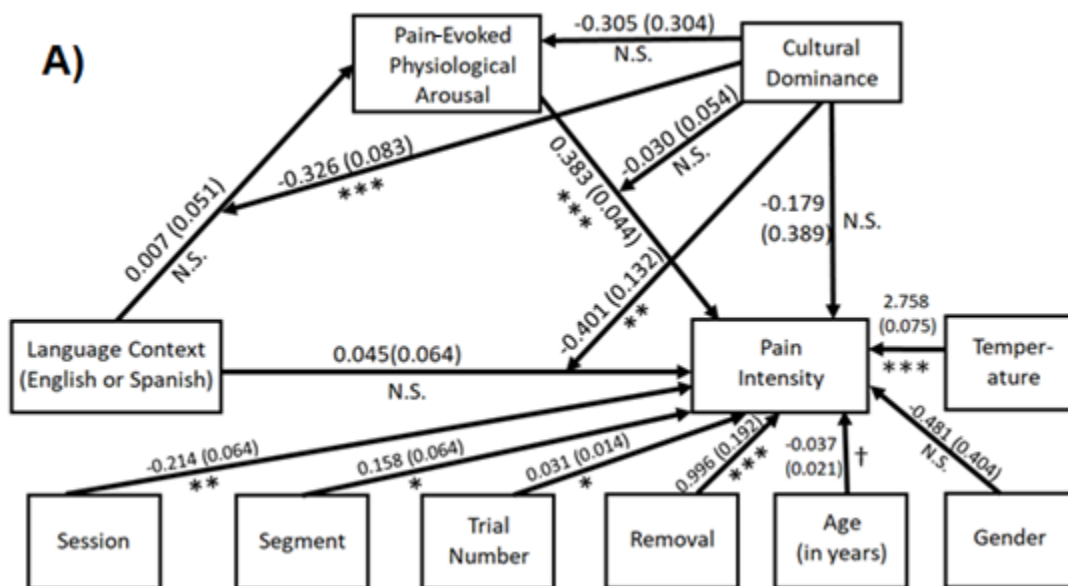

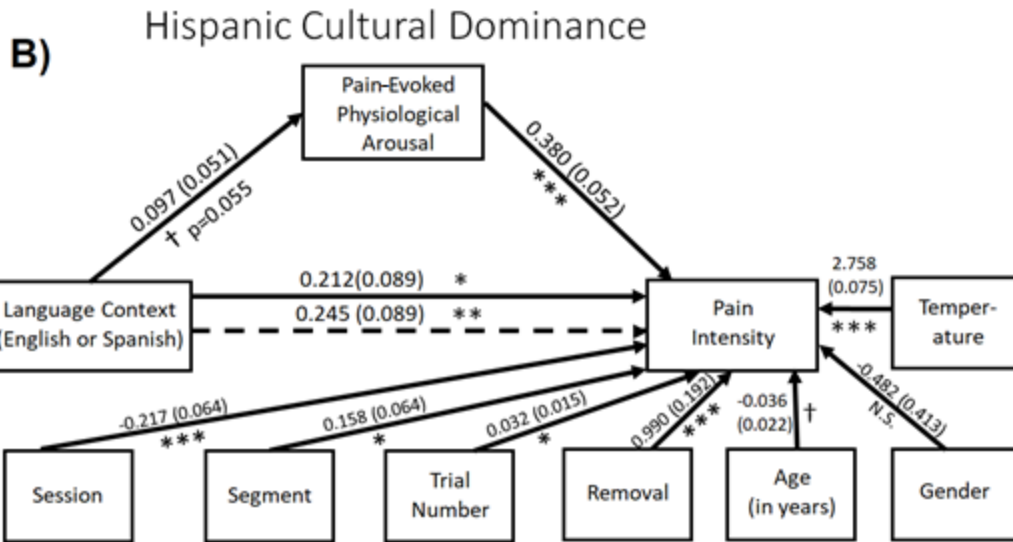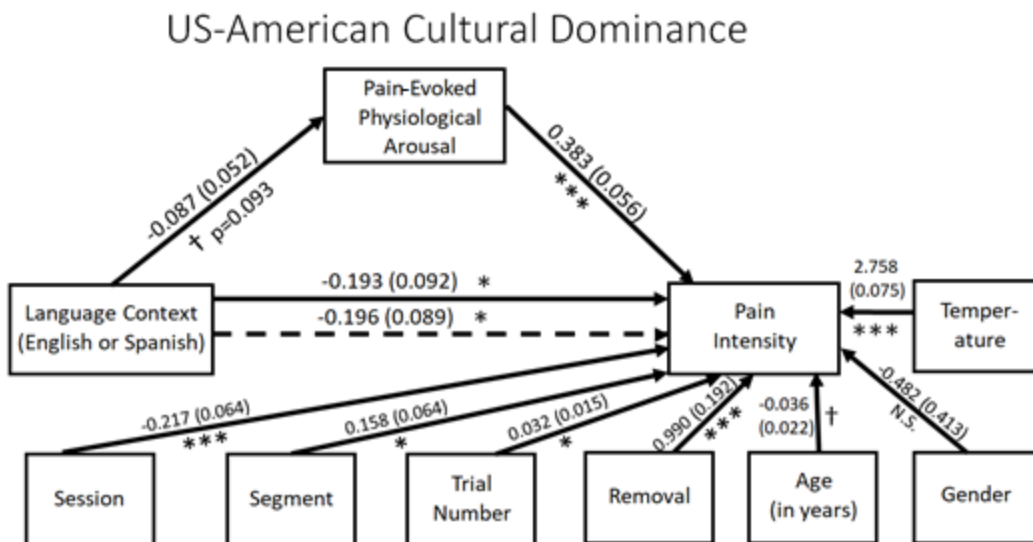

Supplement: 42761_2020_21_MOESM4_ESM.pdf [file 42761_2020_21_MOESM4_ESM.pdf]

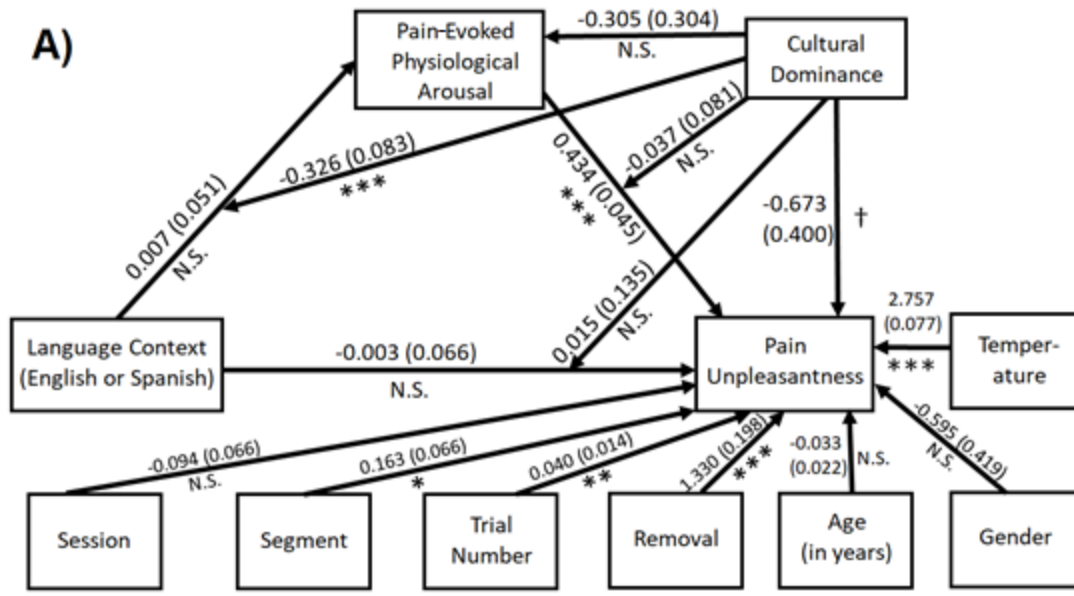

Hispanic Cultural Dominance

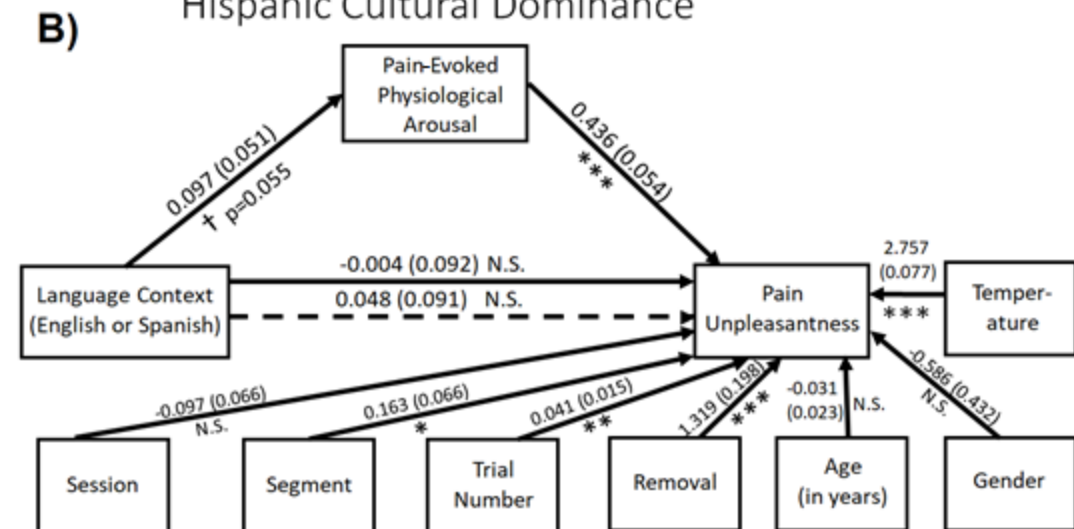

US-American Cultural Dominance

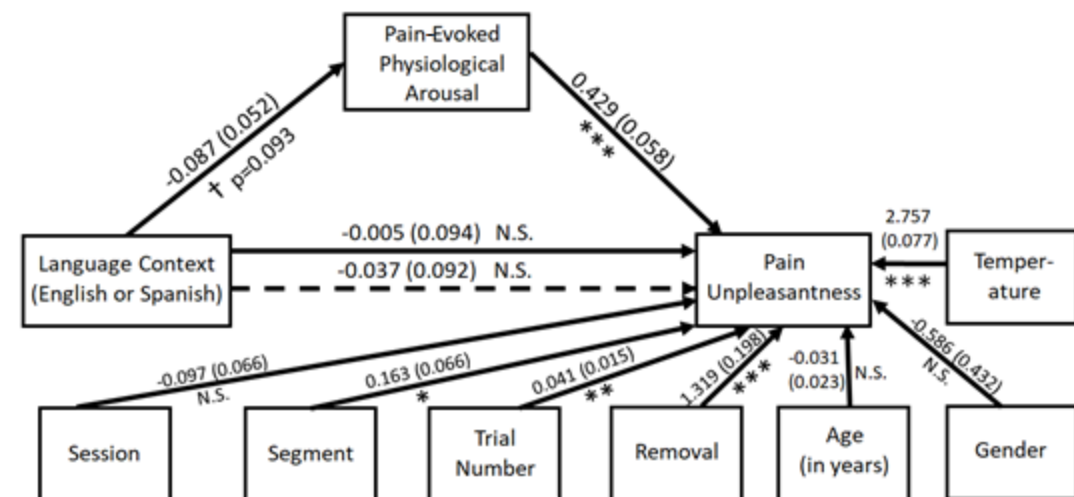

Supplement: 42761_2020_21_MOESM5_ESM.pdf [file 42761_2020_21_MOESM5_ESM.pdf]
